# Supplementary material for: A Zn2-supported B7 wheel structure for the global minimum of the B7Zn2 cluster
Source: Royal Society of Chemistry journal article supplement (doi:10.1039/d4cp04444d), 2025-01-01
Supplement: d4cp04444d1.pdf [file d4cp04444d1.pdf]

## Supporting Information: Zn<sub>2</sub>-supported B<sub>7</sub> wheel structure for the global minimum of B<sub>7</sub>Zn<sub>2</sub> cluster

Energy decomposition analysis, density deformation, charge profiles and density of states for B<sub>7</sub>Zn<sub>2</sub> clusters.

**Table S1** Energy Decomposition Analysis for the Zn<sub>2</sub>-B<sub>7</sub> interaction in both neutral and anionic counterparts. For neutral B<sub>7</sub>Zn<sub>2</sub>, unrestricted calculations were performed. Values in eV.

|                            | Zn <sub>2</sub> B <sub>7</sub> |                    | Zn <sub>2</sub> B <sub>7</sub> <sup>-</sup> |                    |
|----------------------------|--------------------------------|--------------------|---------------------------------------------|--------------------|
| $\Delta E_{\text{Pauli}}$  | 12.49                          |                    | 13.85                                       |                    |
| $\Delta E_{\text{Elstat}}$ | -6.69                          | 43.8% <sup>a</sup> | -8.68                                       | 51.8% <sup>a</sup> |
| $\Delta E_{\text{Orb}}$    | -8.39                          | 55.0% <sup>a</sup> | -7.88                                       | 47.1% <sup>a</sup> |
| $\Delta E_{\text{Disp}}$   | -0.18                          | 1.2% <sup>a</sup>  | -0.18                                       | 1.1% <sup>a</sup>  |
|                            |                                |                    |                                             |                    |
| $\Delta E_{\text{Int}}$    | -2.78                          |                    | -2.88                                       |                    |
|                            |                                |                    |                                             |                    |
| $\Delta\rho_1$             | -6.37                          | 75.9% <sup>b</sup> | -5.57                                       | 70.6% <sup>b</sup> |
| $\Delta\rho_2$             | -0.55                          | 6.5% <sup>b</sup>  | -0.89                                       | 11.3% <sup>b</sup> |
| $\Delta\rho_3$             | -0.50                          | 6.0% <sup>b</sup>  | -0.26                                       | 3.4% <sup>b</sup>  |

<sup>a</sup>Percentage contribution to stabilization terms.

<sup>b</sup>Percentage contribution to  $\Delta E_{\text{Orb}}$ , see Figure S1.

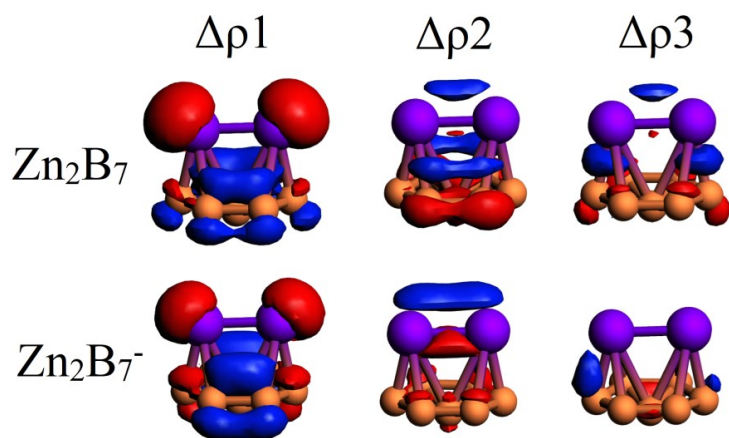

**Figure S1** Density deformation related to the contributions to the overall orbital interactions ( $\Delta E_{\text{Orb}}$ ), provided by  $\Delta\rho_1$ ,  $\Delta\rho_2$ , and,  $\Delta\rho_3$ , in the Zn<sub>2</sub>-B<sub>7</sub> interaction.

**Table S2** Zn-Zn Mayer bond order (Zn-Zn BO), Hirshfeld charge analysis of both Zn<sub>2</sub> and B<sub>7</sub> fragments (qZn<sub>2</sub>/qB<sub>7</sub>), and population of Zn<sub>2</sub> based orbitals, for the free Zn<sub>2</sub> dimer and related B<sub>7</sub> structures.

|                    | Zn <sub>2</sub> | Zn <sub>2</sub> B <sub>7</sub> | Zn <sub>2</sub> B <sub>7</sub> <sup>-</sup> |
|--------------------|-----------------|--------------------------------|---------------------------------------------|
| Zn-Zn BO           | 0.02            | 0.50                           | 0.44                                        |
| qZn <sub>2</sub>   | 0.00            | 0.60                           | 0.33                                        |
| qB <sub>7</sub>    |                 | -0.60                          | -1.33                                       |
| σ-Zn <sub>2</sub>  | 2.00            | 1.94                           | 1.92                                        |
| σ*-Zn <sub>2</sub> | 2.00            | 0.81                           | 0.92                                        |

**Table S3** The vertical ionization energy, vertical electron affinity and HOMO-LUMO gap ( $\Delta_{H-L}$ ) for open-shell structures via the representations of  $\alpha$ - (spin up) and  $\beta$ -orbital (spin down) of 7M2.y (y=1-4) clusters. The energy is given in eV.

|       | IP   | EA   | $\Delta_{H-L}(\alpha)$ | $\Delta_{H-L}(\beta)$ |
|-------|------|------|------------------------|-----------------------|
| 7M2.1 | 7.83 | 2.36 | 3.43                   | 2.37                  |
| 7M2.2 | 8.27 | 2.95 | 3.75                   | 2.15                  |
| 7M2.3 | 7.40 | 1.89 | 2.01                   | 2.27                  |
| 7M2.4 | 7.72 | 2.31 | 2.07                   | 1.82                  |

**Table S4** Representative vibrational modes (in cm<sup>-1</sup>) for 7M2.1 and 7M2.2 clusters. The displacement vectors are represented by blue arrows.

7M2.1

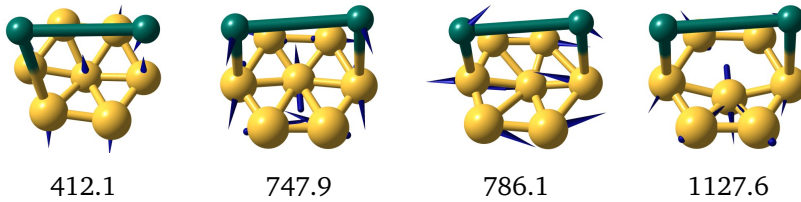

7M2.2

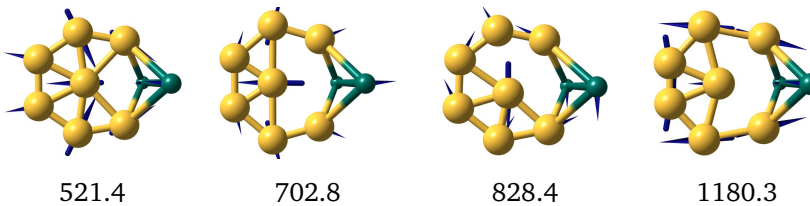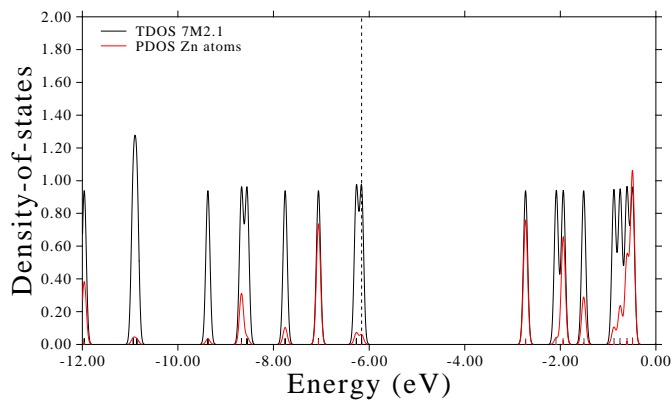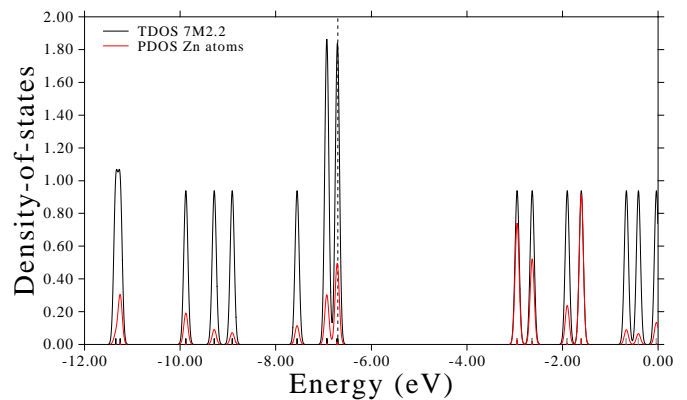

**Figure S2** The total and partial density of states (TDOS, PDOS) 7M2.1 and 7M2.2 clusters. Vertical dashed line corresponds to the HOMO energy level.

**Table S5** Frontier molecular orbitals for 7M2.1 and 7M2.4 clusters.

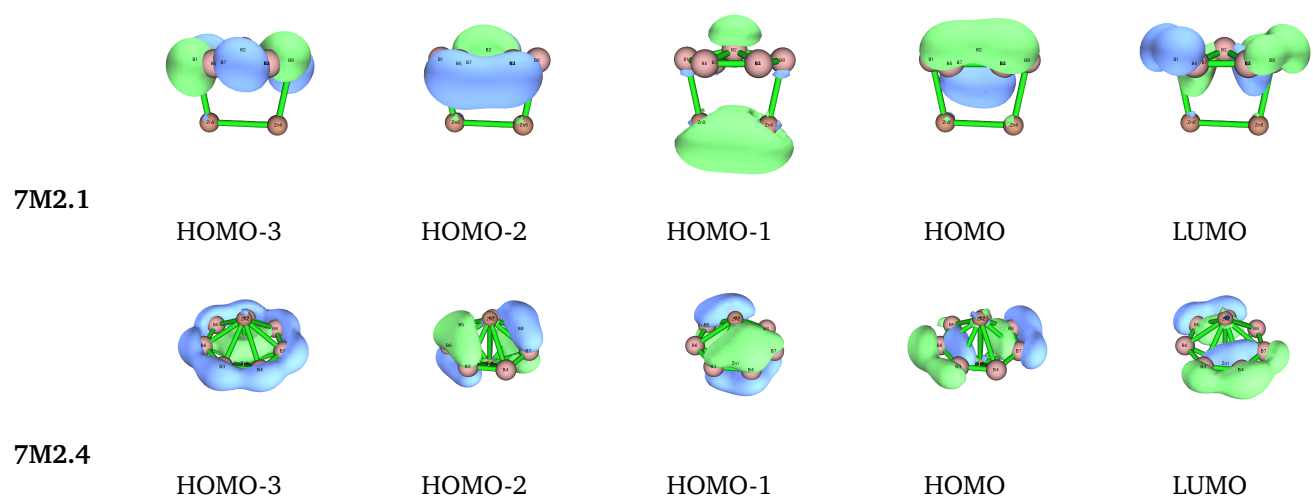

**Cartesian coordinates of representative B<sub>7</sub>Zn<sub>2</sub> clusters, obtained by using the Orca program and the PBE0/Def2-TZVP approach. For each cluster, the charge state and spin multiplicity are given.**

**7M2.1 0, 2**

|    |                   |                   |                   |
|----|-------------------|-------------------|-------------------|
| B  | -1.48468968805429 | -0.16861862643522 | 0.50844481070897  |
| B  | 0.12922516635192  | 0.04980226976932  | 0.83914360214435  |
| B  | 0.78284013331416  | 1.44920353159999  | 0.23503314286272  |
| B  | 1.09477206163736  | -1.26303100763559 | 0.53322503850541  |
| B  | -0.51773186229070 | -1.44689772316720 | 0.52519278815405  |
| Zn | 1.33582593170948  | -0.20542911260106 | -1.66967110401735 |
| B  | -0.82976651665877 | 1.27301494699143  | 0.25951132743633  |
| B  | 1.74973799294483  | 0.19809481843228  | 0.49534409369620  |
| Zn | -1.02786416592875 | -0.20963898141036 | -1.68290875174398 |

**7M2.2 0, 2**

|    |                   |                   |                   |
|----|-------------------|-------------------|-------------------|
| B  | -0.32424105361400 | -0.26165786802271 | 1.50495891897197  |
| B  | 0.06295163516645  | -0.33631635411647 | -0.32889392240490 |
| B  | 0.27917454177419  | 1.49815098962180  | -0.65483898761716 |
| B  | -0.00097877499225 | -2.01873813928066 | -0.70781285487724 |
| B  | -0.27826439129777 | -1.65215128900866 | 0.78270510701150  |
| B  | 0.31137617252334  | -1.07004690548393 | -1.87062368036379 |
| Zn | 1.11513608200286  | 1.33972482112829  | 1.34049067709060  |
| B  | 0.43373404545555  | 0.48485778312230  | -1.84157420292416 |
| Zn | -1.33738330189425 | 1.51051371612366  | 0.78029416557408  |

**7M2.3 0, 2**

|    |                   |                   |                   |
|----|-------------------|-------------------|-------------------|
| B  | -1.38776818148408 | 0.07198103457209  | 1.10877039480688  |
| B  | 0.22681267049961  | 0.09050994770027  | 0.60305071506714  |
| B  | 0.53681725181056  | 1.60966102294020  | -0.12034867823808 |
| B  | 0.38448651540182  | -1.17304756372920 | -0.54036338061338 |
| B  | -0.84320253889526 | -1.23417900134264 | 0.44291224299003  |
| Zn | 2.52477681230466  | -1.25045752014244 | -0.46366533597879 |
| B  | -0.70201067691040 | 1.48704953449675  | 0.82744652296894  |
| B  | 1.11686577433162  | 0.33280843842215  | -0.83618063928179 |
| Zn | -1.19432963807156 | 0.39611494124743  | -1.33973491542759 |

**7M2.4 0, 2**

|    |                   |                   |                   |
|----|-------------------|-------------------|-------------------|
| Zn | -1.30869156167890 | -0.00974399650075 | 0.00151743214576  |
| Zn | 1.30911152161145  | 0.00606163473148  | -0.00095089038530 |
| B  | 0.00396027850074  | -0.89137142970320 | -1.58137247709333 |
| B  | -0.00610687196401 | 0.66962436512400  | -1.76345133320105 |
| B  | 0.00959154527309  | -1.32550418134370 | 1.29397502413000  |
| B  | 0.01048545130787  | -1.78333670648231 | -0.23610720961102 |
| B  | -0.01099564048608 | 1.71283247790773  | -0.58416186067158 |
| B  | -0.00763544039173 | 1.48698957380748  | 1.01546355199584  |
| B  | 0.00028071782757  | 0.13444726245926  | 1.85508876269066  |

**7M2.5 0, 2**

|    |                   |                   |                   |
|----|-------------------|-------------------|-------------------|
| B  | 0.24894775083226  | -0.54456412382267 | 1.87577525591645  |
| B  | 0.33620411097868  | -0.56490676479674 | 0.15758599061660  |
| B  | 1.49831768855164  | 0.83442900416186  | -0.22067694345280 |
| B  | -1.10042956463607 | -1.56150104416079 | -0.36447787099025 |
| B  | -0.78986033234304 | -1.43448353152373 | 1.15496664858026  |
| B  | -0.73771093492061 | -0.68841878519686 | -1.60647114152290 |
| B  | 1.28373392556640  | 0.41388100626373  | 1.24941464085124  |
| Zn | 0.57945972433149  | 0.83297900303255  | -2.02224836670149 |

---

|                   |                   |                   |                   |
|-------------------|-------------------|-------------------|-------------------|
| Zn                | -2.03144344747423 | 0.57356991907946  | -0.45185813650607 |
| <b>7M2.6 0, 2</b> |                   |                   |                   |
| B                 | -1.60925643228336 | -0.11858675857859 | 0.79736847389450  |
| B                 | 0.05649442618271  | 0.05612674242472  | 0.91064997208880  |
| B                 | 0.56364151527496  | 1.42762762508225  | 0.08321492555722  |
| B                 | 0.85302754518955  | -1.30635536345825 | 0.33152372623851  |
| B                 | -0.71229260095248 | -1.41762303280191 | 0.68715261890973  |
| Zn                | 2.05249139099900  | -0.22002110913870 | -1.93511106547808 |
| B                 | -0.99139595292148 | 1.29225871081903  | 0.46589586549999  |
| B                 | 1.55145940911987  | 0.14416873061751  | 0.10015563435639  |
| Zn                | -0.53182024758352 | -0.18109542942246 | -1.39753520332036 |
